# Supplementary material
Source: Springer Nature journal article supplement (https://www.springermedizin.de/resource/supplementary/13041_2013_204_MOESM1_ESM.pdf/25657734)

**A**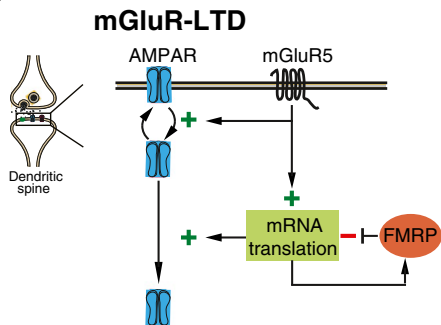**B**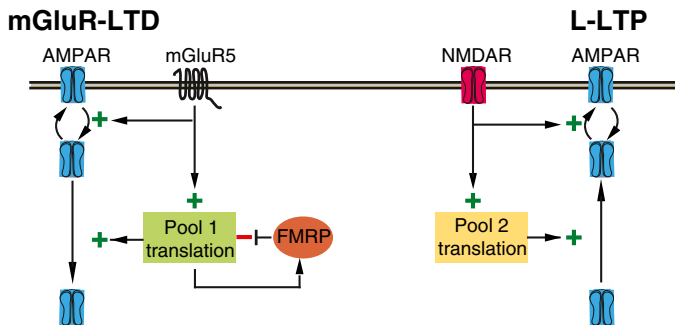**C**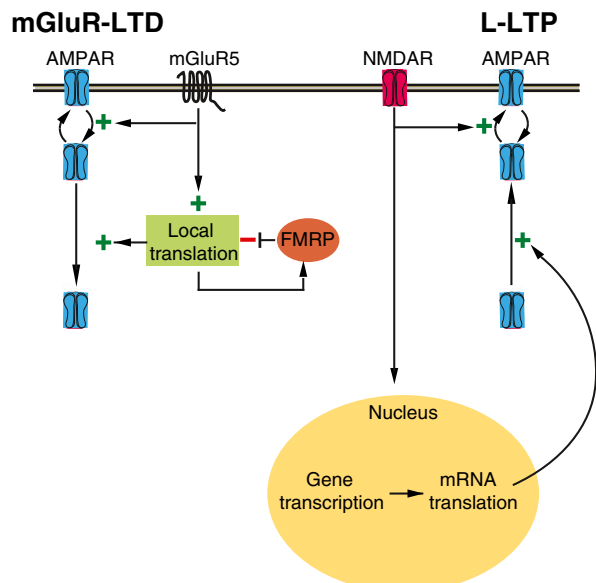**D**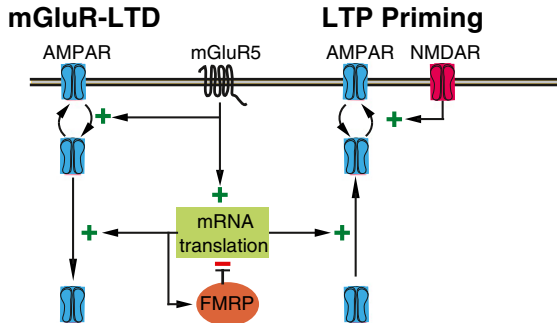

Supplement: MOESM1 [file 25657734]
